# Supplementary material for: Effect of Dronedarone on Cardiovascular Events in Atrial Fibrillation
Source: Atypon-hosted journal article supplement (doi:10.1056/nejmoa0803778), 2009-02-11
Supplement: nejm_hohnloser_668sa1.pdf [file nejm_hohnloser_668sa1.pdf]

## Supplementary Appendix

This appendix has been provided by the authors to give readers additional information about their work.

Supplement to: Hohnloser SH, Crijns HJGM, van Eickels M, et al. Effect of dronedarone on cardiovascular events in atrial fibrillation. *N Engl J Med* 2009;360:668-78.

## Supplemental Appendix

The following authors and investigators participated in the trial.

**Steering committee:** S.H. Hohnloser (principal investigator), H.J.G.M. Crijns, R.L.

Page, C. Torp-Pedersen, S.J. Connolly. **Data safety and monitoring board:** R.

Lipicky (chair), T. Fleming, M. Konstam.

### List of investigational sites which included $\geq 5$ patients:

ARGENTINA: O Oseroff, Hospital Eva Perón, San Martín; J Casabe, Fundación Favaloro, Buenos Aires City; M Elizari, Hospital Ramos Mejía, Buenos Aires City; M Garrido, Clínica Privada Provincial, Prov. of Bs. As; A Alvarisqueta, Clínica Colón, Mar Del Plata; J Vallejos, Instituto de Cardiología De Corrientes, Prov. of Corrientes; M Hominal, Instituto del Tórax y Especialidades, Santa Fe; A Caccavo, Clínica Coronel Suárez, Coronel Suárez; R Memoli, Corporación Médica Gral. San Martín, San Martín; S Hasbani, Centro Privado de Cardiología; Tucumán; O Montaña, DIM-Clinica Privada, Ramos Mejía; AUSTRALIA: G Lane, Fremantle Hospital, Fremantle; P Carroll, Redcliffe Hospital, Redcliffe; J Waites; Coffs Harbour Base Hospital, Coffs Harbour; J Rogers, Gosford Hospital, Gosford; D Eccleston, The Northern Hospital, St. Leonards; AUSTRIA: K Huber, Wilheminspital der Stadt Wien, Wien; BELGIUM: H Heidbüchel, UZ Leuven, Leuven; G Mairesse, Cliniques Du Sud-Luxembourg, Arlon; Y Vandekerckhove, AZ Sint Jan, Brugge; CANADA: P Ma, Cardiology Consultants, Calgary; P Auger, Clinique de Cardiologie de Lévis, Lévis, Québec; J Champagne, Hôpital Laval, Sainte-Foy; R Leather, Victoria Cardiac Arrhythmia Trials Inc., Victoria; C Constance, Hôpital Maisonneuve-Rosemont, Montréal; YK Chan, ICU Niagara Health System-General Site, Niagara-Falls; J Bédard, London Clinical Research, Sherbrooke; T To, Etobicoke Cardiac Research Center, Etobicoke; Z Wulffhart, Newmarket Cardiology Research Group, Newmarket; P Talbot, Recherches Clinicar Inc. Québec; S Kouz, Centre Hospitalier Régional de Lanaudière, St-Charles Borromée; A Kokis, CHUM-Hôpital St-Luc, Montréal; R Bhargava, Heart Care Research, Oshawa; L Yao, Weston; CHILE: S Ugarte, Hospital Del Salvador, Santiago; F Lanás, Hospital Hernán Henríquez Aravena, Temuco; L León, Hospital Sotero Del Río, Santiago; P Campos, Hospital de Urgencias Asistencia, Santiago; CHINA: S Liu, Zhongshan Hospital of Fudan University, Shanghai; W Jiang, The First Affiliated Hospital of Suzhou University, Suzhou; Z Lu, Tongji Hospital of Tongji Medical College of Huazhong University of Science & Technology, Wuhan; B Sun & F Wang, The First People's Hospital of Shanghai Jiaotong University, Shanghai; J Zhu, Fuwai Hospital, Beijing; J Wang, The Second Affiliated Hospital College of Medicine, Zhejiang University, Hangzhou; Y Dong, The First Affiliated Hospital of Sun Yat-Sen University, Guangzhou; K Cao, Jiangsu Province People's Hospital, Nanjing; J Chen, The First Affiliated Hospital College of Medicine Zhejiang University, Hangzhou; CZECH REPUBLIC: V Vancura, IKEM-Kardiologická Klinika, Praha; V Dedek, Nemocnice Usti Nad Orlici, Interni

Oddeleni, Usti Nad Orlici; R Polasek, Nemocnice Liberec, Kardiologicke Oddeleni, Liberec; J Hanis, Nemocnice Ceske Budejovice, Kardiologicke Oddeleni, Ceske Budejovice; V Velimsky, Nemocnice Pisek, Interni Oddeleni, Pisek; P Valasek, Samostatna Ordinance Lekare, Kardiologie, Nachod; D Rucka, UVN Praha, Kardiologicke Oddeleni, Praha; C Ramik, Mestska Nemocnice Ostrava (MNO) Interni Oddeleni, Ostrava; FINLAND: K Peuhkurinen, Medical Center Mehiläinen, Kuopio; J Melin, Suomen Terveystalo, Jyväskylä; S Voutilainen, Medical Center Mehiläinen, Lahti; V-P Harjola, Medical Center Mehiläinen Töölö, Helsinki; K Groundstroem, Kotkan Lääkärikeskus Oy, Kotka; H Kervinen, Hyvinkään Sairaala, Hyvinkää; GERMANY: S Hohnloser, Klinikum der Johann Wolfgang Goethe-Universität, Frankfurt; G Stenzel, Facharzt für Innere Medizin und Kardiologie, Riesa; J Wunderlich, Kardiologische Praxis, Berlin; H Volkmann, EKA Erzgebirgsklinikum Annaberg GmbH, Annaberg-Buchholz; S Spitzer, Zentrum für Klinische Prüfungen in der Facharztzentrum Dresden-Neustadt GbR, Dresden; T Horacek, Forschungszentrum Ruhr, Witten; S Kääb, Klinikum der Universität München, Medizinische Klinik und Poliklinik I, München; M Schumacher, Facharztpraxis, Wolmirstedt; W Haverkamp, Universitätsklinikum Charité, Campus Virchow Klinikum, Medizinische Klinik mit Schwerpunkt Kardiologie, Berlin; A Schmidt, Klinikum Heidenheim, Heidenheim; H Rupprecht, Stadtkrankenhaus Rüsselsheim, Rüsselsheim; W Bauer, Klinikum der Universität Würzburg, Würzburg; A Bauer, Universitätsklinikum Heidelberg, Heidelberg; C Butter, Evangelisch-Freikirchliches Krankenhaus und Herzzentrum Brandenburg In Bernau, Bernau; J Brachmann, Klinikum Coburg GmbH, II Medizinische Klinik, Kardiologie, Angiologie, Pneumologie, Coburg; M Maas, Internistische Praxis, Heidenau; G Haustein, Facharztpraxis Dr. Gabriele Haustein, Berlin; G Meinhardt, Robert-Bosch-Krankenhaus, Zentrum für Innere Medizin Kardiologie/Pulmologie, Stuttgart; V Stangl, Charité-Universitätsmedizin Berlin, Berlin; B Winkelmann, Kardio-Fit GmbH & Co KG, Frankfurt; GREECE: G Deligiannis, Metropolitan Hospital, Athens; A Antoniou, General Hospital "Alexandra", Athens; D Stakos, University General Hospital of Alexandroupolis, Alexandroupolis; I Fotiadis, "G. Gennimatas" General Hospital, Athens; D Babalis & C. Grassos, West Attika General Hospital, Athens; HONG KONG: HF Tse, Queen Mary Hospital, Hong Kong; CM Yu, Prince of Wales Hospital, Hong Kong; KS Wong, Prince of Wales Hospital, Hong-Kong; HUNGARY: J Rapi, Bugát Pál Kórház II Belgyógyászat, Gyöngyös; L Újszászy, Miskolc MJV Semmelweis Kórház Belgyógyászat, Miskolc; A Pálincás, Erzsébet Kórház Belgyógyászat, Hódmezővásárhely; B Benczur, Hetényi Géza Megyei Kórház Kardiológia, Szolnok; Z László, Szent Margit Kórház Belgyógyászat, Budapest; A Katona, Pándy Kálmán Kórház II, Belgyógyászat Kardiológia, Gyula; A Kalina, Állami Egészségügyi Központ, Budapest; A Matoltsy, Nagikanizsa Megyei Jogú Városi Korháza Belgyógyászat, Nagykanizsa; ZS Kovács, Bajai Kórház I. Belgyógyászat, Baja; D Apro, Állami Szivkórház I Kardiológia, Balatonfüred; INDIA: P Vadagenalli, M.S Ramaiah Hospital, Kamataka; A Ravikishore, Narayana Hrudayalaya, Kamataka; ISRAEL: S Viskin, Arrhythmia Clinic, Sourasky Medical Center, Tel Aviv; D Aronson, Cardiology Department Rambam Medical Center, Haifa; R Zimlichman, Wolfson Medical Center, Holon; ITALY: A Raisaro, Divisione di Cardiologia, Policlinico S. Matteo, Pavia; N Glorioso, Centro di Prevenzione, Diagnosi e Terapia Dell'ipertensione Arteriosa e delle Complicanze Cardiovascolari, ASL n.1, Sassari; L Mos, Unitá Operativa di Cardiologia, Ospedale Sant' Antonio, San Daniele Del Friuli; D Bernardi, U.O. di Cardiologia, Ospedale Santa Croce, Castelnovo Di Garfagnana; F Tartagni, U.O. di Cardiologia, Ospecale M. Bufalini, Cesena; G Filorizzo, U.O. Cardiologia Clinica-Riabilitativa, Ospecale San Bartolomeo, Loc. S. Caterina

Sarzana; G Bardelli, U.O. di Cardiologia, Ospedale Civile Fornaroli, Magenta; O Silvestri, U.O. Cardiologia/UTIC – A.O.R.N.A. Cardarelli, Napoli; V. Ciconte, Divisione di Cardiologia, Ospedale Civile A. Pugliese, Catanzaro; P Terrosu, Divisione di Cardiologia, Ospedale SS. Annunziata, Sassari; KOREA: TH Rho, St. Paul's Hospital, Seoul; YH Kim, Korea University Anam Hospital, Seoul; YN Kim, Keimyung University Dongsan Medical Center, Daegu; JS Kim, Samsung Medical Center, Seoul; DG Shin, Yeungnam University Hospital, Daegu; HW Park, Chonnam National University Hospital, Gwangju; GB Nam, Asan Medical Center, Seoul; MALAYSIA: K H Chee, University Malaya Medical Centre, Kuala Lumpur; KH Sim, Sarawak General Hospital, Kuching, Sarawak; MEXICO: CG Calvo-Vargas, Nuevo Hospital Civil De Guadalajara "Dr. Juan I. Menchaca", Guadalajara, Jalisco; E Salcido-Vazquez, Antiguo Hospital Civil de Guadalajara "Fray Antonio Alcalde", Guadalajara, Jalisco; A Meaney-Martinez, Hospital 1o. de Octubre ISSSTE, Mexico City; A Cruz-Diaz, Hospital Central Norte de PEMEX, Mexico City; C Jerjes-SanchezDiaz, Unidad de Investigacion Clinica en Medicina S.C., Monterrey; ME Estrella-Garza, Hospital Universitario "Dr. Eleuterio Gonzalez", Monterrey; MOROCCO: A Hamani, Hôpital Militaire d'instruction Mohammed V, Rabat; THE NETHERLANDS: A. Alings, Amphia Ziekenhuis, Locatie Molengracht, Breda; J Ruiter, Medisch Centrum Alkmaar, Alkmaar; A Willems, Sint Lucas Andreas Ziekenhuis, Amsterdam; M Daniëls, Jeroen Bosch Ziekenhuis, Den Bosch; J Tans, Gemini Ziekenhuis, Den Helder; H Schaafsma, Ziekenhuis Gelderse Vallei, Ede; A Liem, Oosterschelde Ziekenhuis, Goes; D van Doorn, Spaarne Ziekenhuis, Hoofddorp; P Hoogslag, Diaconessenhuis Meppel, Meppel; R van der Heijden, Vlietland Ziekenhuis, Locatie Vlaardingen, Vlaardingen; N Holwerda, Elisabeth Ziekenhuis, Tilburg; B Hamer, Meander Medisch Centrum, Amersfoort; H Crijns, Academisch Ziekenhuis Maastricht, Maastricht; F Bracke, Catharina Ziekenhuis, Eindhoven; C Uitdehaag, Slingeland Ziekenhuis, Doetinchem; G de Ruiter, Onze Lieve Vrouwe Gasthuis, Amsterdam; D Basart, Vasculair Onderzoekscentrum, Hoorn; M Freericks, Ikazia Ziekenhuis, Rotterdam; NEW ZEALAND: D Scott, Middlemore Hospital, Otahuhu, Auckland; NORWAY: T M Omland, Sørlandet Sykehus HF, Flekkefjord, Flekkefjord; PA Sirnes, Østlandske Hjertesenter AS, Moss; PHILIPPINES: G G Domingo, Philippine General Hospital, Manila; POLAND: M Trusz-Gluza, I Oddzial Kardiologii, Samodzielny Szpital Kliniczny Nr 7, Katowice; A Drzewiecki, Wojewodzki Szpital Zespolony, Oddzial Kardiologiczny, Plock; M Dluzniewski, Katedra I Klinika Kardiologii, Warszawa; A Lubinski, II Klinika Chorob Serca Akademii Medycznej, Gdansk; Z Kornacewicz-Jach, Klinika Kardiologii Akademii Medycznej, Szczecin; W Tracz, Krakowski Szpital Specjalistyczny Im., Jana Pawla II, Oddzial Kliniczny Chorob Serca I Naczyn, Krakow; F Prochaczek, Z Bryndal, Wojewodzki Szpital Specjalistyczny, Oddzial Kardiologii, Tychy; K Lobo-Grudzien, Dolnoslaski Szpital Specjalistyczny Im. Marciniaka, Oddzial Kardiologiczny, Wroclaw; K Jaworska, Oddzial Kardiologii, Wojewodzki Szpital Specjalistyczny, Torun; W Piotrowski, Centrum Kardiologiczne AMICOR, Krakow; M Wierzchowiecki, Zaklad Opieki Zdrowotnej Poznan-Jezyce, Szpital Im. Fr. Raszei, Oddzial Chorob Wewnetrznych I Kardiologii, Poznan; T Grodzicki, Szpital Uniwersytecki W. Krakowie, Klinika Chorob Wewnetrznych I Geriatrii, Krakow; T Pasierski, Miedzyleski Szpital Specjalistyczny, Oddzial Kardiologii I Chorob Naczyn, Warszawa; W Kargul, Oddzial Elektrokardiologii, Samodzielny Publiczny Szpital Kliniczny Nr 7, Gornoslaskie Centrum Medyczne Slaskiej Akademii Medycznej, Katowice; PORTUGAL: M Oliveira, Hospital de Santa Marta, Lisboa; RUSSIAN FEDERATION: F Ageev, Russian Cardiology Research Center Outpatient Department, Moscow; N Akhmedzhanov, State Research Center for Preventive

Medicine, Moscow; B Sidorenko, Research Center of Russian Federation President's Management Department, Moscow; S Vaniev, Research Center of Russian Federation President's Management Department, Moscow; D Zateyshchikov, Research Center of Russian Federation President's Management Department, Moscow; G Chernyshova, Outpatient Clinic #1 of Russian Federation President's Management Department, Moscow; A Blokhin, Outpatient Clinic #3 of Russian Federation President's Management Department, Moscow; V Konstantinov, Veteran's Hospital, St-Petersburg; Y Shubik, North-West Center for Diagnostic and Treatment of Arrhythmias, St-Petersburg; K Zrazhevsky, City Hospital #8, St-Petersburg; Y Titkov, Central Medical Unit #122, St-Petersburg; V Tyrenko, Military Medical Academy N.A., St-Petersburg; A Vishnevsky, City Pokrovsky Hospital, St. Petersburg; M Glezer, City Clinical Hospital #68, Moscow; S. Tereschenko, City Clinical Hospital #68, Moscow; M. Baluda, City Clinical Hospital #70, Moscow; A Shpektor, City Clinical Hospital #23, Moscow; O Khrustalev, Yaroslavl Regional Clinical Hospital, Yaroslavl; V Mkrtchian, Veteran's Hospital #3, Moscow; B Bart, Diagnostic Clinical Center #1, Moscow; N Egorova, City Clinical Hospital #6, Moscow; M Boyarkin, City Alexandrovsky Hospital, St. Petersburg; S Gilyarevsky, Central Clinical Hospital #1 OAO RZhD, Moscow; V Moiseev, City Clinical Hospital # 64, Moscow; Y Shvarts, City Clinical Hospital #3, Saratov; V Kostenko, Research Institute for Emergency, St-Petersburg; V Yakusevich, Clinical Emergency Hospital n.a. N.V. Soloviev, Yaroslavl; V Lesnov, City Clinical Hospital #12, Nizhny Novgorod; O Barbarash, Kemerovo Cardiologic Dispensary, Kemerovo; A Duda, Altay Regional Cardiologic Dispensary, Barnaul; D Belenky, Novosibirsk City Clinical Emergency Hospital #2, Novosibirsk; O Lapin, City Clinical Hospital #4, Perm; V Barbarich, City Clinical Hospital #1, Novosibirsk; I Novitsky, City Hospital #2, Kaluga; S Shalaev, Tyumen Regional Clinical Hospital, Tyumen; I Gordeev, City Clinical Hospital #15 n.a. O.M. Filatov, Moscow; S Boldueva, St-Petersburg Medical Academy n.a. I.I. Mechnikov, Department of Therapy, St-Petersburg; SINGAPORE: L F Hsu, National Heart Centre, Department of Cardiology, Singapore; SOUTH AFRICA: R Routier, Olivedale Clinic, Randburg, Olivedale; L Van Zyl, Clinical Projects Research, Worcester; J. Engelbrecht, Vergelegen Medi-Clinic, Somerset West; T Venter, Union Hospital, Alberton; H Du Toit Theron, Cardiology Research, Universitas Private Hospital, Bloemfontein; T Pillay, Dick Willimason Medical Center, Cape Town, Pinelands; SPAIN: LL Mont, Hospital Clinic I Provincial, Barcelona; X Viñolas, Hospital De Santa Creu I Sant Pau, Barcelona; JL Merino, Hospital Universitario La Paz, Madrid; X Sabate, Hospital Ciutat Sanitària i Universitaria de Bellvitge, L'Hospitalet; SWEDEN: P Blomström, Akademiska Sjukhuset, Uppsala; F Jacobsson, SU/Östra, Sjukhuset, Göteborg; S Wiberg, Centrallasarettet, Västerås; P Brunmark, Sjukhuset i Arvika, Arvika; A Stjerna, Mälarsjukhuset, Eskilstuna; P Cherfan, Höglandssjukhuset, Eksjö; G Kennebäck, Karolinska Universitetssjukhuset, Huddinge; G Falck, Bollnäs Sjukhus, Bollnäs; TAIWAN: KC Ueng, Chung-San Medical University Hospital, Taichung; J L Lin, National Taiwan University Hospital, Taipei; L J Lin, National Cheng Kung University Hospital, Tainan; THAILAND: A Sukonthasarn, Chiangmai University Hospital, Chiangmai; TUNISIA: H Haouala, Hopital Militaire Montfleury, Tunis; S Kammoun, Hopital Hédi Chaker, Sfax; L Slimane, Hopital Habib Thameur, Tunis; S Kachboura, Abderrahmene Mami University Hospital, Ariana; TURKEY: M Demirtas, Cukurova University, Adana; UNITED KINGDOM: D Springings, Northampton General Hospital Cliftonville, Northamptonshire; L D Smith, Royal Devon and Exeter Hospital, Exeter, Devon UNITED STATES: G Altemose, Mayo Clinic Arizona, Phoenix; T Bahnson, Duke University Medical Center, Durham; H Bajwa, Nebraska Heart Institute, Lincoln; N

Bedwell, Mobile Heart Specialists PC, Mobile; G Crossley, Mid-State Cardiology, Nashville; S DeFehr, Bluestem Cardiology, Bartlesville; D Denny, River Cities Cardiology, Jeffersonville; G Emlein, Sacramento Heart and Vascular; Sacramento Research; D Gottlieb, Burien; E Grogan, Wisconsin Heart, S.C., Madison; J Heinsimer, Roval Oak; A Jacobson, VA Loma Linda Healthcare System, Loma Linda; H Karunaratne, Florida Heart Group, Orlando; R Lemman, Medical University of South Carolina, Charleston; M Nallasivan, Merced Heart Associates, Merced; I Niazi, Arrhythmia Center for Southern Wisconsin, Ltd., Milwaukee; P Ogden, Creekside Clinical Research, Greenbrae; J Onufer, Cardiovascular Associates Ltd., Chesapeake; G San, Upstate Cardiology PA, Greenville; W Short, St Lukes Cardiology Associates A, Jacksonville; R Shroff, Institution – Dr Rajesh Shorff, MD; Hot Springs; R Silverman, Heart Care Center, East Syracuse; B Singh, VAMC-GLAHS, Los Angeles; J Sklar, Cardiovascular Associates of Marin and San Francisco, Larkspur; R Goldberg, La Mesa Cardiac Center, La Mesa; A Steljes, Steljes Clinical Research, Henderson; J Teixeira, Black Hills Research, Rapid City; E Telfer, Rockford Cardiology Associates, Rockford; S Varma, Boice-Willis Clinic, Rocky Mountain; R Vicari, MIMA, Melbourne; J Rittelmeyer, Clinical Research Office, Winchester; D Williams, Atlantic Institute of Clinical Research, Daytona Beach; D James, Medicor Research, Rolla; R Bellam, Bellam Medical Clinic, Dunnellon; U Vejendla, Private Practice, Jamestown; J Cannon, Sumter Medical Consultants PA, Sumter; N Daboul, Advance Medical Research, Maumee; C Gessler, The Heart Center PC, Huntsville; E Rivera, Amarillo Heart Clinical Research Institute Inc., Amarillo; D Phillips, Northwest Florida Heart Group PA, Pensacola; V Nguyen, The Heart & Vascular Institute of Florida, Safety Harbor; P Wassmer, Heart & Vascular Institute of Florida, St Petersburg; K Sullivan, Cardiology Associates PC, Annapolis; P Sharma, Marshfield Clinic Main, Marshfield; H Chandna, Victoria Heart & Vascular Center, Victoria; R Luke, Jacksonville Heart Center, Jacksonville Beach; R Patel, Lycoming Internal Medicine, Jersey Shore; S Benjamin, Internal Medicine Northwest, Tacoma; M Springer, Medical Center Cardiologists Research Foundation, Louisville; S Goels, Jacksonville Heart Center, Jacksonville; R Swint, Northern Indiana Research Alliance, Fort Wayne; M Sackett, Cardiovascular Associates of Central Virginia, Lynchburg; D Henderson, Cardiology Research Associates, Ormond Beach; C Bricker, Wenatchee Valley Clinic, Wenatchee; R Weiss, Androscoggin Cardiology Associates; Auburn; S Clemo, VA Cardiovascular Consultants, Fredericksburg; S Goldman, Southern Arizona VA Medical Center, Tucson; C Sheehan, The International Heart Institute of Montana, Missoula; T Cheng, Gurnee; K Klancke, Cardiology Consultants, Daytona Beach; M El Shahawy, Cardiovascular Center of Sarasota, Sarasota; J Raffetto, Peninsula Cardiology Associates, Salisbury; A Rubin, Desert Cardiology, Rancho Mirage; P Kotha, San Diego; A Haidar, Mississippi Medical Research, Picayune; A Labroo, Advanced Cardiovascular Consultants, Rock Island; E Prystowsky, The Care Group, Indianapolis; G Kulkarni, Midwest Cardiovascular Specialists, Elkhart; N Mayer, Ventura Cardiology Consultants Medical Group Inc., Ventura; A Cornish, Lexington Clinic, Lexington; E Kosinski, Connecticut Clinical Research, Bridgeport; J Lelevier, Progressive Clinical Research, Vista; A Adler, Methodist Heart Lung & Vascular Institute, Peoria; D Gilligan, VA Cardiologist Specialists, Richmond; J McCriskin, Illinois Heart & Lung Research S.C., Normal; A Kirby, The Heart Center of Eastern Carolina, New Bern; M Nora, Midwest Heart Foundation, Lombard; P Counihan, University of Pittsburgh Medical Center, Pittsburgh; B Bertolet, Cardiology Associates of North Mississippi, Tupelo; C Treasure, Cardiovascular Research of Knoxville, Knoxville; S Pai, Loma Linda University Med. Center, Loma Linda; K Ramaswamy, Northeast Georgie Heart

Center PC, Gainesville; J Gelormini, Buffalo Heart Group, Buffalo; R Bauernfeind, Heart Care Midwest, Peoria; M Sharma, Parkway Cardiology Associates; Oak Ridge; J Naidu, Attn: Research, Odessa; K Adams, Jacksonville Heart Center, Jacksonville; B Tashakkor, Southern California Heart Specialists, Pasadena; B Jackson, A.R.I. Clinical Trials Inc.; Redondo Beach; T Forrest, James H. Quillen VA Medical Center, Mountain Home; K Browne, Watson Clinic Center for Research Inc., Lakeland; L Byrd, Rowan Research Inc., Spokane; N Jaffrani, Alexandria Cardiology Clinic, Alexandria; K Krell, Eastern Idaho Medical Consultants PLLC, Idaho Falls; M Jazaveri, Cardiology Associates of Green Bay, Green Bay; I Friedlander, Cardiovascular Consultants, Canton; M Stein, CVMS Research Institute LCC, Jupiter; A Shandling, The Heart and Vascular Institute Long Beach Memorial Medical Center, Long Beach
